# Supplementary material
Source: PubMed Central journal article supplement (PMC3047097)

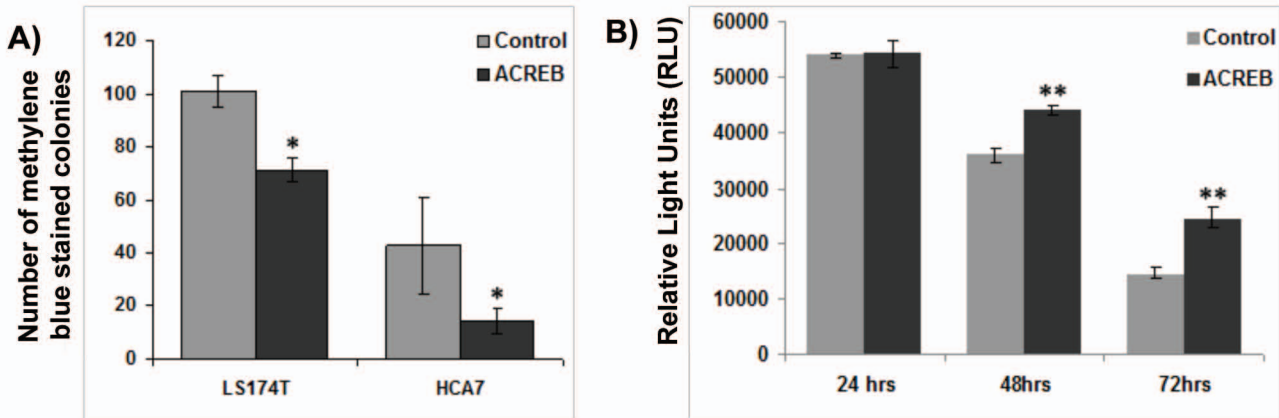

**C)**

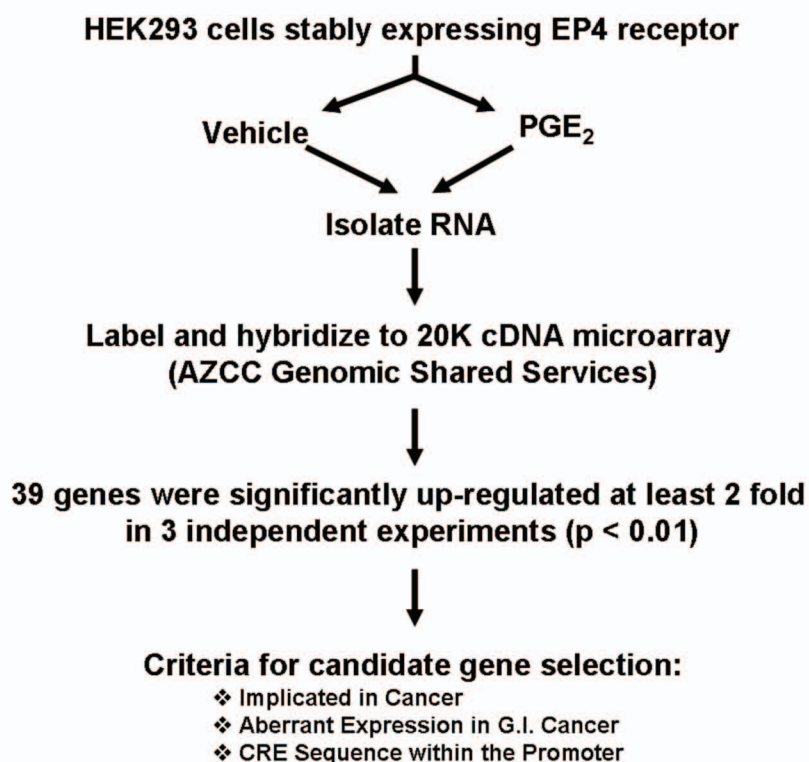

Suppl. Fig. 1



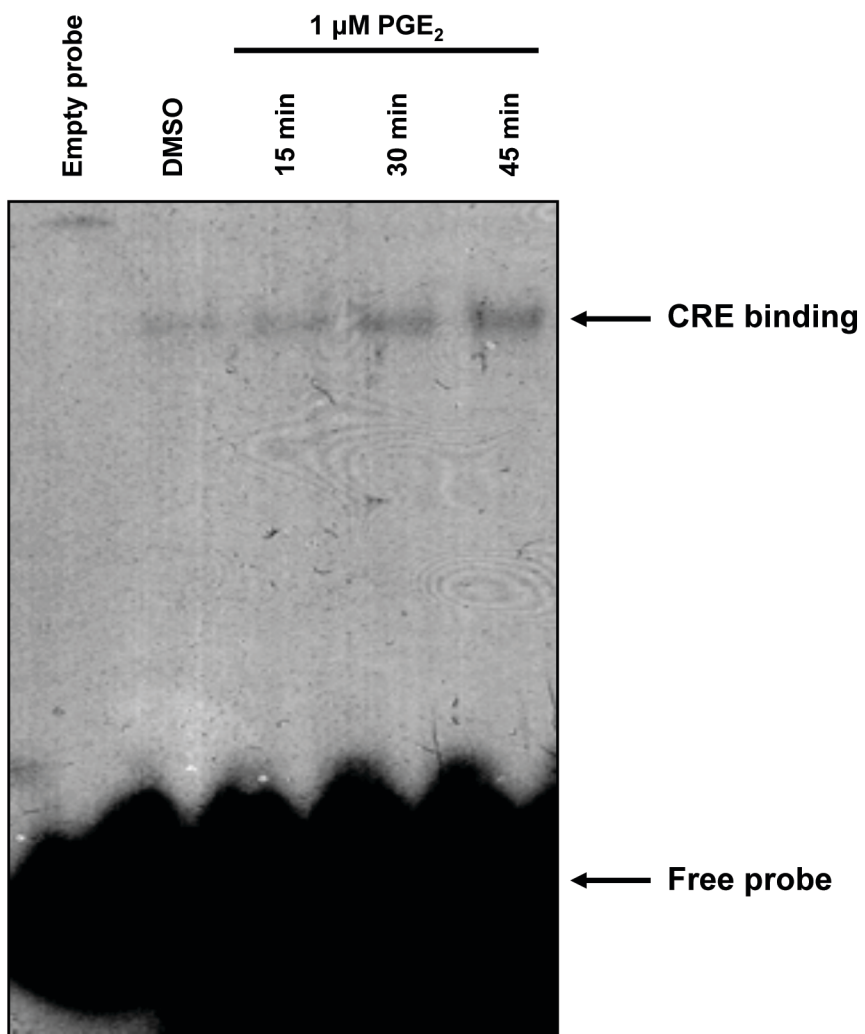

Suppl. Fig. 3

Supplement: cbt1010_1056SD1.pdf [file cbt1010_1056SD1.pdf]
